# Supplementary material for: Identification, Functional Study, and Promoter Analysis of HbMFT1, a Homolog of MFT from Rubber Tree (Hevea brasiliensis)
Source: PubMed Central journal article supplement (PMC4813128; doi:10.3390/ijms17030247), 2016-03-02
Supplement: ijms-17-00247-s001.pdf [file ijms-17-00247-s001.pdf]

# Supplementary Materials: Identification, Functional Study, and Promoter Analysis of *HbMFT1*, a Homolog of *MFT* from Rubber Tree (*Hevea brasiliensis*)

Zhenghong Bi, Xiang Li, Huasun Huang and Yuwei Hua

**Table S1.** Putative *cis*-element of *HbMFT1* promoter analysis with PLACE database.

| <i>cis</i> -Acting Element | Element Sequence | Element Number | Function                                    |
|----------------------------|------------------|----------------|---------------------------------------------|
| WBOXATNPR1                 | TTGAC            | 1              | Salicylic acid (SA)-induced element         |
| WBOXHVISO1                 | TGACT            | 3              | Sugar-responsive elements                   |
| WRKY71OS                   | TGAC             | 6              | GA-responsive element                       |
| WBOXNTERF3                 | TGACY            | 4              | Wounding-responsive element                 |
| GATABOX                    | GATA             | 3              | Seed-specific element                       |
| GARE1OSREP1                | TAACAGA          | 1              | GA-responsive element                       |
| DOFCOREZM                  | AAAG             | 17             | Endosperm-specific element                  |
| SEF4MOTIFGM7S              | RTTTTTR          | 3              | Embryo expression element                   |
| CCAATBOX1                  | CCAAT            | 2              | Heat-responsive element                     |
| MYBCORE                    | CNGTTR           | 3              | Water stress-responsive element             |
| NODCON2GM                  | CTCTT            | 14             | Nodules-expression element                  |
| SORLIP1AT                  | GCCAC            | 1              | Light-responsive element                    |
| GTGANTG10                  | GTGA             | 8              | Pollen expression element                   |
| SEBFCONSSTPR10A            | YTGTCWC          | 2              | Auxin-responsive element                    |
| BIHD1OS                    | TGTCA            | 7              | Disease-responsive element                  |
| GT1CONSENSUS               | GRWAAW           | 9              | Light-responsive element                    |
| SURECOREATSULTR11          | GAGAC            | 2              | Sulfur-responsive element                   |
| TAAAGSTKST1                | TAAAG            | 3              | Guard cells expression element              |
| POLLEN1LELAT52             | AGAAA            | 5              | Pollen-specific element                     |
| CURECORECR                 | GTAC             | 2              | Oxygen-responsive element                   |
| ANAERO1CONSENSUS           | AAACAAA          | 1              | Oxygen-responsive element                   |
| AACACOREOSGLUB1            | AACAAAC          | 1              | Endosperm-specific element                  |
| EBOXBNNAPA                 | CANNTG           | 16             | Storage-protein element                     |
| GT1GMSCAM4                 | GAAAAA           | 2              | Light-responsive element                    |
| MYCATERD1                  | CATGTG           | 1              | Storage-protein element                     |
| SITEIIATCYTC               | TGGGCY           | 2              | Anther- and meristem-specific element       |
| MYCATRD22                  | CACATG           | 1              | Storage-protein element                     |
| 2SSEEDPROTBANAPA           | CAAACAC          | 1              | Storage-protein element                     |
| CANBNNAPA                  | CNAACAC          | 3              | Embryo- and endosperm-specific element      |
| PROXBNNAPA                 | CAAACACC         | 1              | Embryo- and endosperm-specific element      |
| CIACADIANLELHC             | CAANNNNATC       | 2              | Circadian expression element                |
| SORLIP2AT                  | GGGCC            | 2              | Light-responsive element                    |
| PYRIMIDINEBOXOSRAMY1A      | CCTTTT           | 2              | Sugar-responsive element                    |
| NODCON1GM                  | AAAGAT           | 2              | Nodule-specific element                     |
| RAV1AAT                    | CAACA            | 2              | Rosette leaves- and roots-specific element  |
| DPBFCOREDCCDC3             | ACACNNG          | 3              | Embryo-specific element                     |
| ASF1MOTIFCAMV              | TGACG            | 1              | Auxin-and salicylic acid-responsive element |
| CACGCAATGMGH3              | CACGCAAT         | 1              | Auxin-responsive element                    |
| SEF3MOTIFGM                | AACCCA           | 1              | Embryo-specific element                     |
| LTRECOREATCOR15            | CCGAC            | 1              | Low temperature-responsive element          |
| CACGTGMOTIF                | CACGTG           | 1              | light-responsive element                    |
| ABRERATCAL                 | MACGYGB          | 2              | light-responsive element                    |
| ACGTABREMOTIFA0SEM         | TACGTGTC         | 2              | ABA-responsive element                      |
| ABRE3HVA1                  | GCAACGTGTC       | 1              | ABA-responsive element                      |
| QARBNEXTA                  | AACGTGT          | 1              | JA-responsive element                       |
| T/GBOXATPIN2               | AACGTG           | 1              | JA-responsive element                       |
| ACGTABREMOTIFA2OSEM        | ACGTGKC          | 2              | ABA-responsive element                      |
| GADOWNAT                   | ACGTGTC          | 2              | GA-responsive element                       |
| TGTCACACMCUCUMISIN         | TGTCACA          | 1              | Fruit-specific element                      |
| RHERPATEXPA7               | KCACGW           | 1              | Root hair-specific <i>cis</i> -elements     |
| RAV1BAT                    | CACCTG           | 1              | Rosette leaves- and roots-specific element  |

**Table S2.** The sequences of primers used for amplification of *HbMFT1* gene and its promoter and construction of related binary vectors.

| Name                 | Sequence(from 5' to 3')                                | Feature                                                                                                                                        |
|----------------------|--------------------------------------------------------|------------------------------------------------------------------------------------------------------------------------------------------------|
| Q0                   | CCAGTGAGCAGAGTGACC                                     | Adaptor primer for 3' RACE                                                                                                                     |
| Q1                   | GAGGACTCGAGCTCAAGC                                     | Adaptor primer for 3' RACE                                                                                                                     |
| QT                   | CCAGTGAGCAGAGTGACGAGGACTCGAGCTC<br>AAGCTTTTTTTTTTTTTT  | Used as reverse transcription primer for 3' RACE                                                                                               |
| GSP1                 | AACAAATCGCTAATGGCTGGGAAAT                              | <i>HbMFT1</i> gene-specific primer for 3' RACE                                                                                                 |
| GSP2                 | GGCTTCCAGTTGCTGTGTATTTAACTCG                           | <i>HbMFT1</i> gene-specific primer for 3' RACE                                                                                                 |
| <i>HbMFT</i> (ORF)-F | <u>GGAATTC</u> CATGGCTCGGTCCCT                         | Used for cloning the ORF of <i>HbMFT1</i> and construction of 35S:: <i>HbMFT1</i> .<br>The added <i>EcoRI</i> was underlined.                  |
| <i>HbMFT</i> (ORF)-R | GCTCTAGAGCTCAACGTTTTTTAAACAG                           | Used for cloning the ORF of <i>HbMFT1</i> and construction of 35S:: <i>HbMFT1</i> .<br>The added <i>XbaI</i> was underlined.                   |
| <i>HbMFTQ1</i> -F    | <u>GCTCTAGAG</u> GGGGTGAATCTTGACTTCTGCGAC              | Used for cloning putative promoter of <i>HbMFT1</i> and construction of <i>HbMFT1</i> :: <i>GUS</i> .<br>The added <i>XbaI</i> was underlined. |
| <i>HbMFTQ1</i> -R    | CATG <u>CCATGG</u> AGTTATGATCAAACAGGACCCA<br>GGTGGTGCC | Used for cloning putative promoter of <i>HbMFT1</i> and construction of <i>HbMFT1</i> :: <i>GUS</i> .<br>The added <i>NcoI</i> was underlined. |

**Table S3.** Gene-specific primers for qRT-PCR.

| Primers(QF/QR) *                                                                   | Program | Sequence                                                         | Primer Efficiency | References |
|------------------------------------------------------------------------------------|---------|------------------------------------------------------------------|-------------------|------------|
| <i>HbYLS8</i> (reference)-QF<br><i>HbYLS8</i> (reference)-QR                       | C       | CCTCGTCGTCATCCGATTC<br>CAGGCACCTCAGTGATGTC                       | 1.98              | [56]       |
| <i>HbRH2b</i> (reference)-QF<br><i>HbRH2b</i> (reference)-QR                       | D       | AGGTGGATTGGCTAACTGAG<br>GAGCCCAAACATCAGTAGTG                     | 1.99              | [56]       |
| <i>HbRH8</i> (reference)-QF<br><i>HbRH8</i> (reference)-QR                         | D       | TCACAGGGTTGGTAGATCAG<br>CCAAGCTCTTGCTCAATCC                      | 1.99              | [56]       |
| <i>HbMFT1</i> -QF <sup>a</sup><br><i>HbMFT1</i> -QR <sup>a</sup>                   | B       | GTGACCCAAAACAAGAAACAAT<br>ATCAGAGGAGAAACGAGAACC                  | 1.95              | –          |
| At2g28390(reference)-QF<br>At2g28390(reference)-QR                                 | B       | TTCAGACAAGGCGATGG<br>GCAAGAACACTTCATTCTCCACA                     | 1.94              | [55]       |
| At3G01150(reference)-QF<br>At3G01150(reference)-QR                                 | C       | CGTCATACTGATCTGAATGTTAAGGCTTTTAGCG<br>CATAGTAAGGAGGTGACCTGAGGGTG | 1.95              | [19,54]    |
| Target( <i>HbMFT1</i> )-QF <sup>b</sup><br>Target( <i>HbMFT1</i> )-QR <sup>b</sup> | D       | GTCCGCAAAAATCACCAGTCTCT<br>CCCTTATCTGGGAACACTACTCACAC            |                   |            |
| AtAP1-QF<br>AtAP1-QR                                                               | A       | CTCCATAAATAAAGATCCCGAGACTCAA<br>CTAAAAGAACCAAACAAAACAAAGACCC     | 1.98              |            |
| AtLFY-QF<br>AtLFY-QR                                                               | C       | TGCTAAAGACCGTGCCGAAA<br>AACAAGCCTGACGCCATGAG                     | 1.96              |            |
| AtFUL-QF<br>AtFUL-QR                                                               | D       | TTGCAAGATCACAACAATTCGCTTCT<br>GAGAGTTTGGTTCCTCAACGACGAT          | 1.94              |            |
| AtSOC1-QF<br>AtSOC1-QR                                                             | C       | ACACAAATAGATGAAACGAGGAAAAG<br>TGTATGTATAGGTAGAGATATAGGAGGAGACT   | 1.96              |            |

A 95 °C for 30 s; 40× (95 °C for 10 s, 56 °C for 20 s, and 72 °C for 20 s); B 95 °C for 30 s; 40× (95 °C for 10 s, 60 °C for 20 s, and 72 °C for 20 s); C 95 °C for 30 s; 40× (95 °C for 10 s, 62 °C for 20 s, and 72 °C for 20 s); D 95 °C for 30 s; 40× (95 °C for 10 s, 64 °C for 20 s, and 72 °C for 20 s); \* QF and QR represent forward and reverse primers for qRT-PCR, respectively; <sup>a</sup> represents forward and reverse primers of *HbMFT1* gene used for qRT-PCR in rubber tree; <sup>b</sup> represents forward and reverse primers of *HbMFT1* gene used for qRT-PCR in *Arabidopsis* plant.

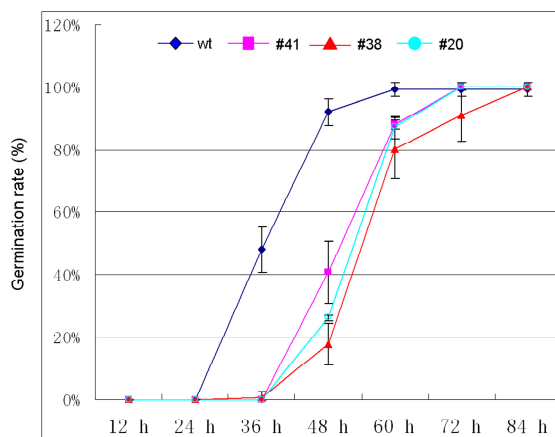

**Figure S1.** Time course of the germination rate after transformation with 35S::HbMFT1.
